# Supplementary material
Source: publisher figshare collection journal article supplement (https://sage.figshare.com/ndownloader/files/13812209)
Supplement: Supplementary file 1 [file 13812209]

**eTable 1.** Primary reasons for ADE readmission within 30 days of hospital discharge.

| Primary Reason for Readmission (ICD-9 code : description)                        | n (%) <sup>a</sup> |
|----------------------------------------------------------------------------------|--------------------|
| 965.09 : Poisoning by other opiates and related narcotics                        | 491 (19.8)         |
| 693.0 : Dermatitis due to drugs and medicines taken internally                   | 361 (14.6)         |
| 969.4 : Poisoning by benzodiazepine-based tranquilizers                          | 256 (10.4)         |
| 962.3 : Poisoning by insulins and antidiabetic agents                            | 218 (8.8)          |
| 967.9 : Poisoning by unspecified sedative or hypnotic                            | 136 (5.5)          |
| 977.9 : Poisoning by unspecified drug or medicinal substance                     | 86 (3.5)           |
| 964.2 : Poisoning by anticoagulants                                              | 86 (3.5)           |
| 965.02 : Poisoning by methadone                                                  | 67 (2.7)           |
| 965.8 : Poisoning by other specified analgesics and antipyretics                 | 66 (2.7)           |
| 977.8 : Poisoning by other specified drugs and medicinal substances              | 65 (2.6)           |
| 965.4 : Poisoning by aromatic analgesics, not elsewhere classified               | 64 (2.6)           |
| 972.6 : Poisoning by other antihypertensive agents                               | 62 (2.5)           |
| 966.3 : Poisoning by other and unspecified anticonvulsants                       | 60 (2.4)           |
| 967.8 : Poisoning by other sedatives and hypnotics                               | 56 (2.3)           |
| 975.2 : Poisoning by skeletal muscle relaxants                                   | 42 (1.7)           |
| 969.3 : Poisoning by other antipsychotics, neuroleptics, and major tranquilizers | 38 (1.5)           |
| 970.1 : Poisoning by opiate antagonists                                          | 25 (1.0)           |
| 966.1 : Poisoning by hydantoin derivatives                                       | 25 (1.0)           |
| 968.0 : Poisoning by central nervous system muscle-tone depressants              | 19 (0.8)           |
| 974.4 : Poisoning by other diuretics                                             | 18 (0.7)           |
| 969.8 : Poisoning by other specified psychotropic agents                         | 17 (0.7)           |
| 972.1 : Poisoning by cardiotonic glycosides and drugs of similar action          | 16 (0.7)           |
| 971.3 : Poisoning by sympatholytics [antiadrenergics]                            | 14 (0.6)           |
| 965.1 : Poisoning by salicylates                                                 | 14 (0.6)           |
| 357.6 : Polyneuropathy due to drugs                                              | 14 (0.6)           |
| 967.0 : Poisoning by barbiturates                                                | 13 (0.5)           |
| 963.0 : Poisoning by antiallergic and antiemetic drugs                           | 12 (0.5)           |

Abbreviations: ADE, adverse drug event; ICD-9, International Classification of Diseases, Ninth Revision.

<sup>a</sup>Values  $\leq 10$  suppressed to minimize risk of individual identification.

**eTable 2.** Odds of ADE readmission within 30 days of hospital discharge according to demographic, clinical, and care setting characteristics.

| Characteristic                                | OR                    | AOR <sup>a</sup>      |
|-----------------------------------------------|-----------------------|-----------------------|
| <b>Age</b>                                    |                       |                       |
| < 40                                          | Reference             | Reference             |
| 40-49                                         | 2.51 (1.90 - 3.31)*** | 1.47 (1.07 - 2.01)*   |
| 50-59                                         | 3.82 (3.05 - 4.79)*** | 1.83 (1.39 - 2.42)*** |
| 60-69                                         | 3.11 (2.42 - 4.00)*** | 1.15 (0.83 - 1.61)    |
| 70-79                                         | 2.21 (1.68 - 2.89)*** | 0.63 (0.44 - 0.91)*   |
| 80-89                                         | 1.61 (1.16 - 2.25)**  | 0.43 (0.29 - 0.64)*** |
| 90+                                           | 1.22 (0.80 - 1.88)    | 0.32 (0.20 - 0.53)*** |
| <b>Sex</b>                                    |                       |                       |
| Female                                        | Reference             | Reference             |
| Male                                          | 1.25 (1.08 - 1.45)**  | 0.97 (0.84 - 1.13)    |
| <b>Primary payer</b>                          |                       |                       |
| Private insurance                             | Reference             | Reference             |
| Medicare                                      | 2.63 (2.17 - 3.20)*** | 2.47 (1.96 - 3.12)*** |
| Medicaid                                      | 2.47 (1.93 - 3.17)*** | 2.34 (1.82 - 3.00)*** |
| Other                                         | 1.38 (0.99 - 1.94)    | 1.25 (0.89 - 1.75)    |
| Missing                                       | n/a                   | n/a                   |
| <b>Median household income</b>                |                       |                       |
| \$66,000+                                     | Reference             | Reference             |
| \$51,000 - \$65,999                           | 1.00 (0.81 - 1.22)    | 0.91 (0.74 - 1.11)    |
| \$40,000 - \$50,999                           | 1.28 (1.04 - 1.56)*   | 1.09 (0.90 - 1.33)    |
| \$1 - \$39,999                                | 1.29 (1.05 - 1.57)*   | 0.97 (0.79 - 1.19)    |
| Missing                                       | n/a                   | n/a                   |
| <b>Length of stay</b>                         |                       |                       |
| 0 - 7 days                                    | Reference             | Reference             |
| > 7 days                                      | 1.76 (1.50 - 2.08)*** | 1.04 (0.87 - 1.24)    |
| <b>Discharge disposition</b>                  |                       |                       |
| Routine (including home)                      | Reference             | Reference             |
| Transfer: short-term hospital                 | 0.75 (0.33 - 1.71)    | 0.62 (0.27 - 1.43)    |
| Transfer: other type of facility <sup>b</sup> | 1.36 (1.14 - 1.63)*** | 1.10 (0.90 - 1.35)    |
| Home health care                              | 2.18 (1.85 - 2.56)*** | 1.71 (1.42 - 2.05)*** |
| Against medical advice                        | 2.45 (1.64 - 3.64)*** | 1.74 (1.15 - 2.62)**  |
| Discharged alive, destination unknown         | 3.04 (0.77 - 12.03)   | 2.54 (0.65 - 9.94)    |
| <b>Comorbidities</b>                          |                       |                       |
| 0-2                                           | Reference             | Reference             |
| 3-4                                           | 3.32 (2.78 - 3.95)*** | 2.91 (2.33 - 3.62)*** |
| 5-6                                           | 4.56 (3.75 - 5.55)*** | 3.85 (3.01 - 4.93)*** |
| 7+                                            | 5.69 (4.62 - 7.00)*** | 4.73 (3.63 - 6.17)*** |

|                                       |                      |                      |
|---------------------------------------|----------------------|----------------------|
| Bed size of hospital <sup>c</sup>     |                      |                      |
| Small                                 | Reference            | Reference            |
| Medium                                | 1.08 (0.85 - 1.37)   | 1.06 (0.85 - 1.34)   |
| Large                                 | 1.32 (1.06 - 1.65)*  | 1.27 (1.03 - 1.57)*  |
| Control/ownership of hospital         |                      |                      |
| Government, non-federal (public)      | Reference            | Reference            |
| Private, not-for-profit (voluntary)   | 1.03 (0.83 - 1.27)   | 1.02 (0.83 - 1.25)   |
| Private, investor-owned (proprietary) | 1.17 (0.92 - 1.49)   | 1.18 (0.93 - 1.49)   |
| Teaching status of hospital           |                      |                      |
| Metropolitan teaching                 | Reference            | Reference            |
| Metropolitan non-teaching             | 0.98 (0.84 - 1.15)   | 0.97 (0.83 - 1.13)   |
| Non-metropolitan                      | 0.64 (0.48 - 0.84)** | 0.63 (0.48 - 0.84)** |

Abbreviations: ADE, adverse drug event; AOR, adjusted odds ratio; OR, odds ratio.

<sup>a</sup>Adjusted for all factors listed in table.

<sup>b</sup>Includes skilled nursing facilities and intermediate care facilities.

<sup>c</sup>Reported categories are based on number hospital beds, which are specific to hospital location and teaching status. Classification details are available on the HCUP website (<https://www.hcup-us.ahrq.gov>).

\*\*\*p<0.001; \*\*p<0.01; \*p < 0.05
